# 1 Insect wings and body wall evolved from ancient leg segments

2  
3 Heather S. Bruce\* and Nipam H. Patel

4 Department of Molecular and Cell Biology, University of California, Berkeley, CA

5 \*Correspondence: [hbruce@berkeley.edu](mailto:hbruce@berkeley.edu)

6  
7 **Researchers have long debated the origin of insect wings. One theory proposes that**  
8 **the proximal portion of the ancestral crustacean leg became incorporated into the body<sup>1-3</sup>,**  
9 **which moved the leg's epipod (multi-functional lobe, e.g. gill) dorsally, up onto the back to**  
10 **form insect wings<sup>4</sup>. Another theory proposes that the dorsal insect body wall co-opted**  
11 **crustacean epipod genes to form wings<sup>5</sup>. Alternatively, wings may be derived from both leg**  
12 **and body wall (dual origin)<sup>6</sup>. To determine whether wings can be traced to ancestral, pre-**  
13 **insect structures, or arose by co-option, comparisons are necessary between insects and**  
14 **arthropods more representative of the ancestral state, where the hypothesized proximal leg**  
15 **region is not fused to the body wall. To do so, we examined the function of five leg gap**  
16 **genes in the crustacean *Parhyale hawaiiensis* and compared this to previous functional data**  
17 **from insects. Here we show, using CRISPR-Cas9 mutagenesis, that leg segment deletion**  
18 **phenotypes of all five leg gap genes in *Parhyale* align to those of insects only by including**  
19 **the hypothesized fused ancestral proximal leg region. We also argue that possession of eight**  
20 **leg segments is the ancestral state for crustaceans. Thus, *Parhyale* incorporated one leg**  
21 **segment into the body, which now bears the tergal plate, while insects incorporated two leg**  
22 **segments into the body, the most proximal one bearing the wing. We propose a model**  
23 **wherein much of the body wall of insects, including the entire wing, is derived from these**  
24 **two ancestral proximal leg segments, giving the appearance of a “dual origin”<sup>6-10</sup>. This**  
25 **model explains many observations in favor of either the body wall, epipod, or dual origin of**  
26 **insect wings.**

27  
28  
29 Arthropod appendages are key to their spectacular success, but their incredible diversity  
30 has complicated comparisons between distantly related species. The origin of the most debated  
31 appendage, insect wings, pivots on the alignment of leg segments, because wings may be derived  
32 from an epipod (e.g. gill or plate, Fig. 1b)<sup>11</sup> of ancestral leg segments that fused to the body<sup>4,12</sup>,  
33 or alternatively, may represent a co-option of the epipod-patterning pathway by the insect body  
34 wall<sup>5</sup>, or a combination of both<sup>6-10,13</sup>. To answer this, functional comparisons are necessary  
35 between insects and arthropods more representative of the ancestral state, where the  
36 hypothesized proximal leg region is not fused to the body wall.

37 Towards this aim, we examined five leg gap genes, *Distalless* (*Dll*), *Sp6-9*, *dachshund*  
38 (*dac*), *extradenticle* (*exd*), and *homothorax* (*hth*), in an amphipod crustacean, *Parhyale*  
39 *hawaiiensis*. While we have documented their expression at several developmental stages (Fig.  
40 S1), our comparative analysis does not rely solely on these expression patterns, given that  
41 expression is not always a reliable indication of function, and expression is often temporally  
42 dynamic<sup>14</sup>. Instead, we have systematically knocked out these genes in *Parhyale* using CRISPR-  
43 Cas9 mutagenesis and compared this to our understanding of their function in *Drosophila* and  
44 other insects (Figs. 2, S2).

45 Insects have six leg segments, while *Parhyale* has seven (Fig. 1). In insects, *Dll* is  
46 required for the development of leg segments 2 – 6<sup>15-18</sup>. In *Parhyale*, the canonical *Dll* gene,

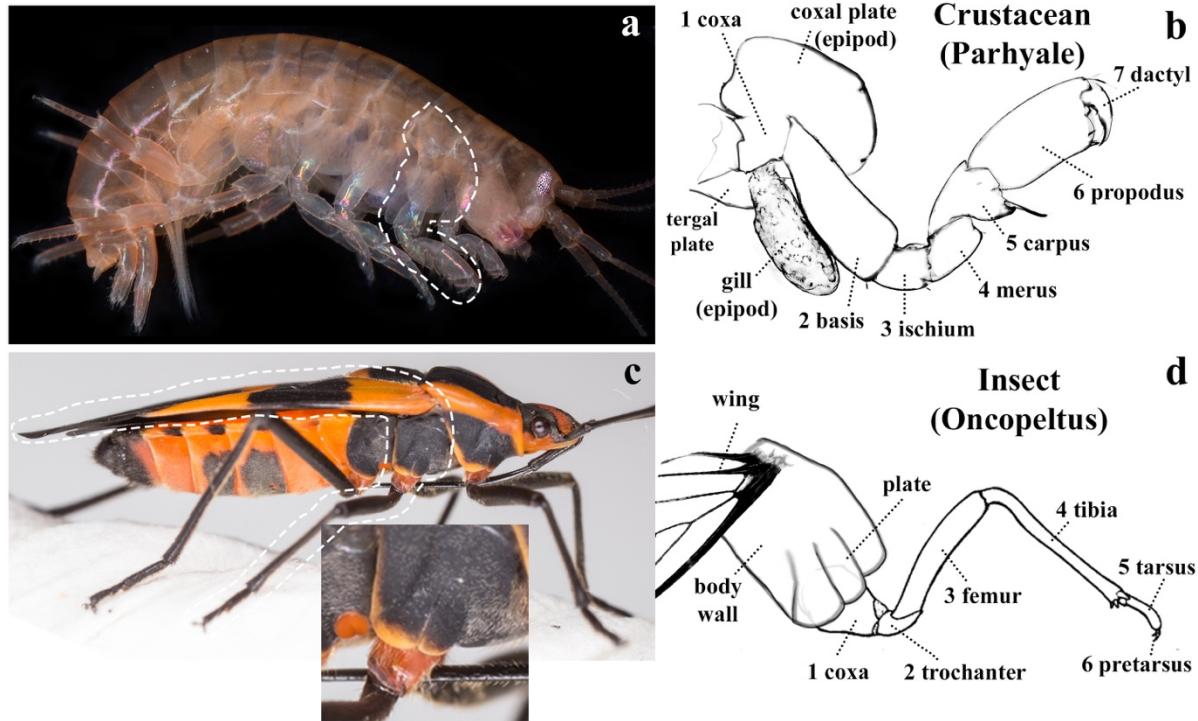

Fig. 1. Crustacean and insect legs. (a) Adult *Parhyale*, with third thoracic leg (T3) outlined. (b) Cartoon of *Parhyale* T3. The coxal plate extends over the leg. (c) Adult *Oncopeltus*, with T2 outlined. Inset shows magnified proximal leg, with body wall plate extending over the leg. (d) Cartoon of *Oncopeltus* T2 leg.

47  
 48 *Dll-e*<sup>19-21</sup>, is required for the development of leg segments 3 – 7 (Fig. 2b). In insects, *Sp6-*  
 49 *9* is required for the development of leg segments 1 – 6<sup>15,22-24</sup>, and in addition in *Drosophila*,  
 50 loss of *Sp6-9* (i.e. D-*Sp1*<sup>23</sup>) occasionally transforms the leg towards wing and lateral body wall  
 51 identity<sup>24</sup>. In *Parhyale*, *Sp6-9*<sup>23</sup> is required for the development of leg segments 2 – 7 (Fig. 2c),  
 52 and in some legs, segment 2 is occasionally homeotically transformed towards a leg segment 1  
 53 identity (Fig S3). In *Drosophila*, *dac* is required in the trochanter through proximal tarsus (leg  
 54 segments 2 – 4, and first tarsus)<sup>25,26</sup>. *Parhyale* has 2 *dac* paralogs. *Dac1* does not seem to be  
 55 expressed in the legs or have a knockout phenotype. *Dac2* is required to pattern leg segments 3 –  
 56 5 (Fig. 2d). *Exd* and *hth* are expressed in the body wall and proximal leg segments of insects<sup>27-30</sup>  
 57 and *Parhyale*<sup>31</sup> (Fig S1). They form heterodimers<sup>32</sup> and therefore have similar phenotypes<sup>27-30</sup>. In  
 58 insects, *exd* or *hth* knockout results in deletions/fusions of the coxa through proximal tibia (leg  
 59 segments 1 – 3, and proximal tibia)<sup>27-30</sup>. In *Parhyale*, *exd* or *hth* knockout results in  
 60 deletions/fusions of the coxa through proximal carpus (leg segments 1 – 4, and proximal carpus;  
 61 Figs. 2e, f). In both insects<sup>27,28,33</sup> and *Parhyale*, the remaining distal leg segments are sometimes  
 62 transformed towards a generalized thoracic leg identity (compare Fig. 2 e, f and Fig S4). In both  
 63 insects<sup>27-30</sup> and *Parhyale* (Fig. S4), *exd* or *hth* knockout results in deletions/fusions of body  
 64 segments.

65 In summary, the expression and function of *Dll*, *Sp6-9*, *dac*, *exd*, and *hth* in *Parhyale* are  
 66 shifted distally by one segment relative to insects. This shift is accounted for if insects fused an  
 67 ancestral proximal leg segment to the body wall (Fig. 2g). Thus, there is a one-to-one homology  
 68 between insect and *Parhyale* legs, displaced by one segment, such that the insect coxa is  
 69 homologous to the crustacean basis, the insect femur is the crustacean ischium, and so on for all

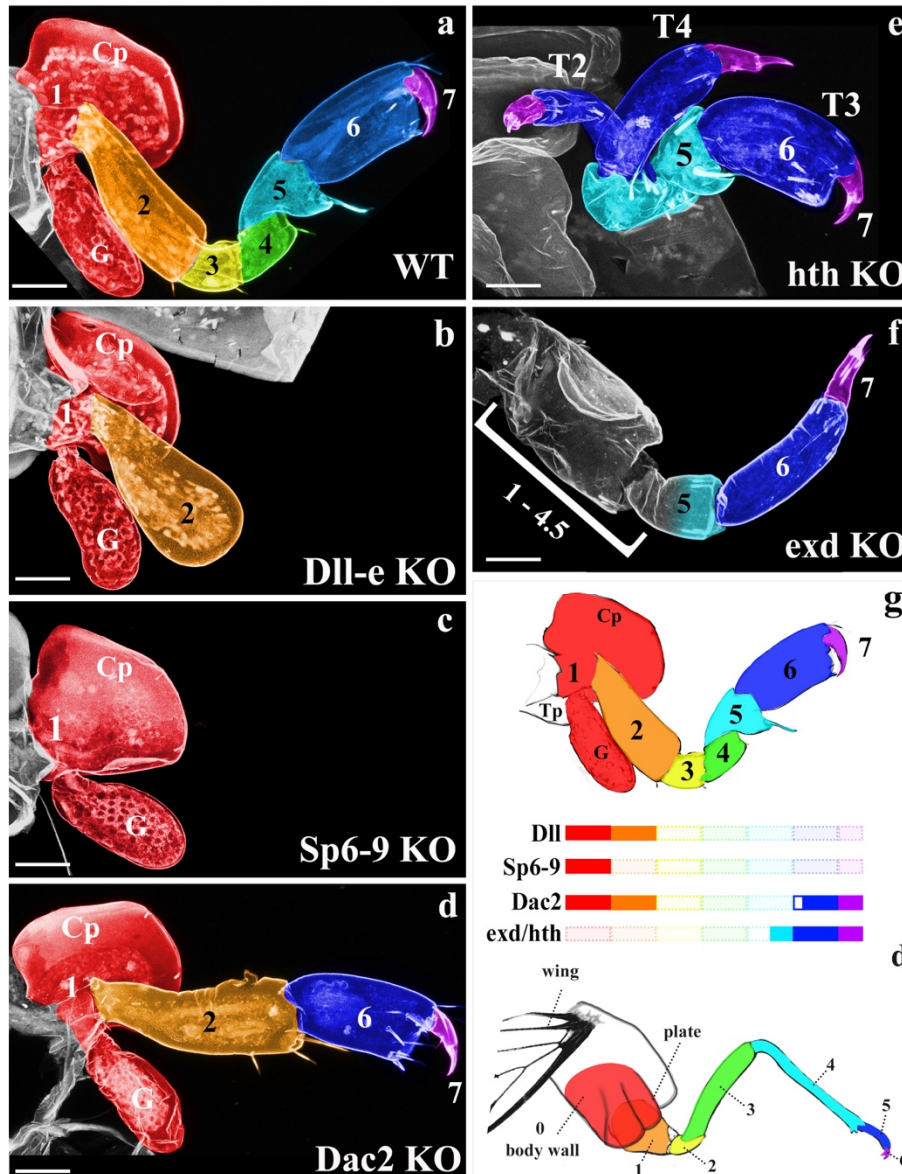

Fig. 2. Knockout phenotypes of leg gap genes. (a-f) *Parhyale* CRISPR-Cas9 phenotypes in dissected third thoracic legs (T3). Graded cyan in f indicates deletion/fusion of proximal leg segment 5. (g) Leg gap gene function in *Parhyale* and insects aligns only if insects incorporated the red leg segment into the body wall (0). Color bars correspond to remaining leg segments following knockout, transparent bars indicate deleted leg segments. Open bar in *dac* indicates slight extension of *dac* function into tarsus 1 of insects. Coxal plate (Cp), gill (G), tergal plate (Tp). Scale bar 50um.

70

71 leg segments. This also means that at least part of the insect body wall is homologous to the  
72 crustacean coxa.

73 The data thus far is agnostic regarding the origin of the insect wing. However, we noted  
74 that *Parhyale* has what appears to be an epipod, the tergal plate, emerging proximal to the coxa.  
75 Clark-Hachtel<sup>13</sup> show that the tergal plate, coxal plate, and basal plate all require the same  
76 “wing” genes, indicating that all three are epipods. They also show that nubbin, a marker of  
77 arthropod leg joints, is expressed in a distinct stripe above the *Parhyale* tergal plate, suggesting  
78 there is a leg segment here. An examination of the crustacean appendage morphology literature  
79 in the context of recent phylogenies shows that most crustaceans in fact have an additional  
80 proximal leg segment, the precoxa (Fig. 3a), and that the presence of a precoxa is the ancestral  
81 state. Although a precoxa has not been previously documented in amphipods<sup>34</sup>, a careful  
82 examination using confocal and bright field microscopy reveals that *Parhyale* has a structure  
83 between the coxa and body wall that meets the criteria for a leg segment: it protrudes from the

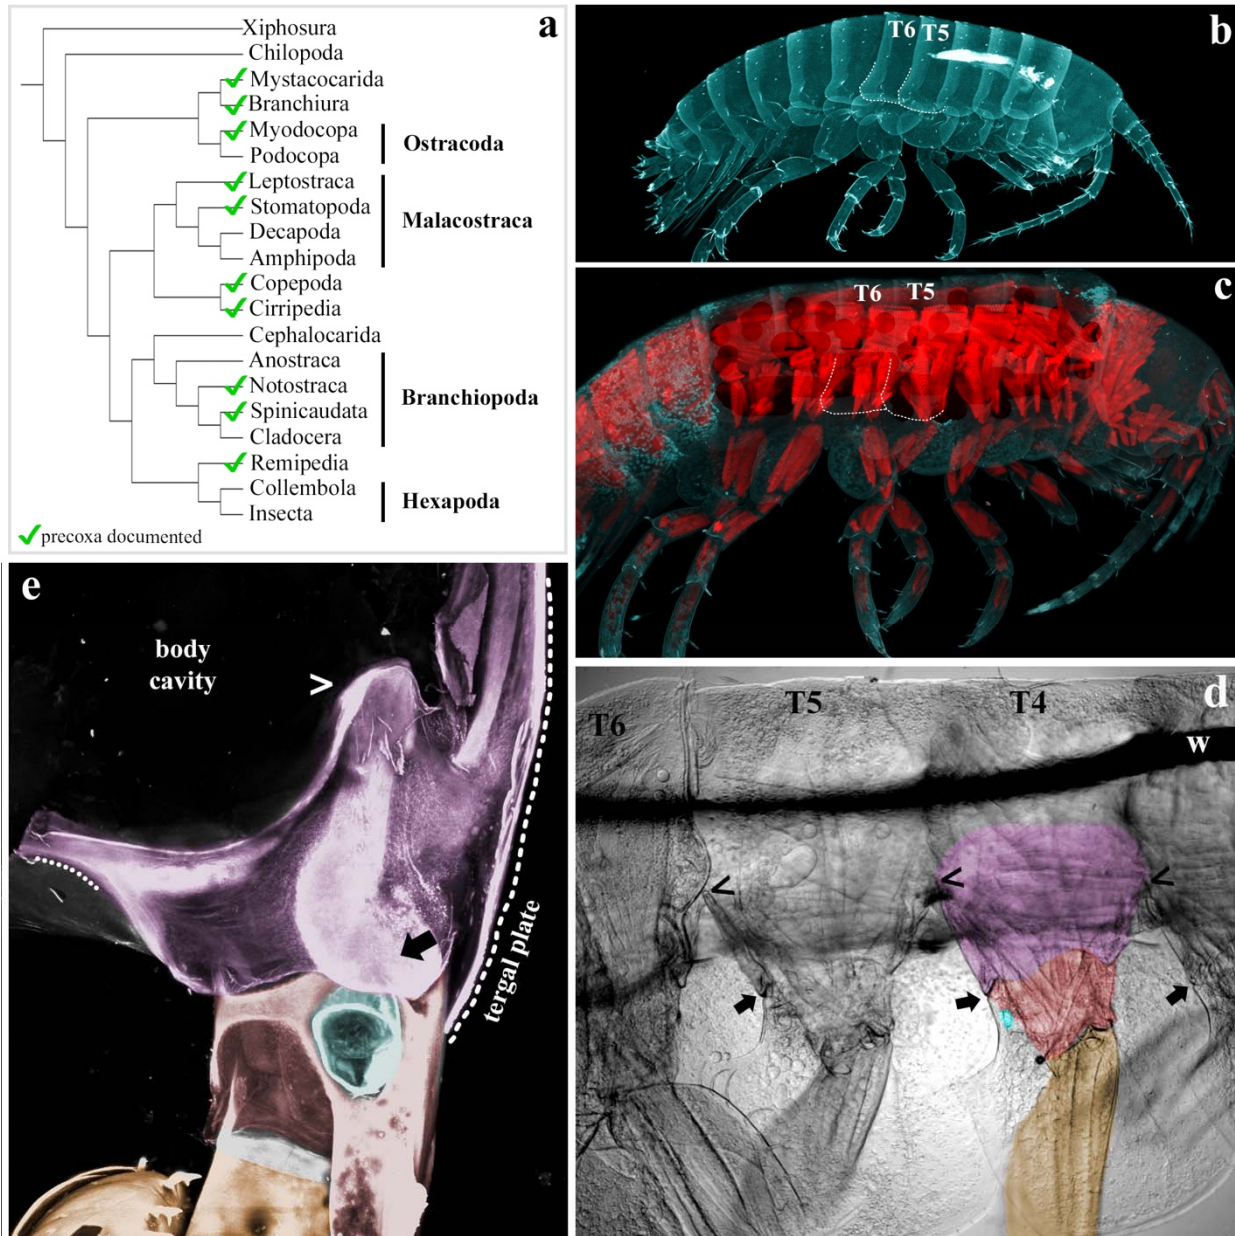

84 body wall; it forms a true, muscled joint; and it extends musculature to another leg segment  
 85 (Figs. 3 and S5)<sup>12,35,36</sup>. Furthermore, the tergal plate emerges not from the body wall, but from  
 86 this precoxa (Fig. 3e). Thus, much of what appears to be lateral body wall in *Parhyale* is in fact  
 87 proximal leg.

88 Since insects evolved from crustaceans, if the insect coxa is homologous to the  
 89 crustacean basis, then one would expect to find two leg segments incorporated into the insect  
 90 body wall, each equipped with an epipod (Fig. 4). As predicted, two leg-like segments can be  
 91 observed proximal to the coxa in basal hexapods<sup>2</sup> including collembolans<sup>37</sup>, as well as in the  
 92 embryos of many insects<sup>9,38,39</sup>. In insect embryos, these two leg-like segments flatten out before  
 93 hatching to form the lateral body wall<sup>2,3,9,37-40</sup> (Fig 1c). Furthermore, insects indeed have two  
 94 epipods proximal to the insect coxa. When “wing” genes are depleted in insects via RNAi, two  
 95 distinct regions are affected: the wing, but also the protruding plate adjacent to the leg

96 < Fig. 3. *Parhyale* has a precoxa. (a) Phylogeny based on Oakley 2012, precoxa references in  
97 supplements. (b) Confocal of *Parhyale* hatchling. Round T5 tergal plate and pointy T6 tergal  
98 plate (dashed outlines). (c) Confocal of *Parhyale* hatchling, cuticle in cyan, muscle in red. Note  
99 the blocks of simple, anterior-posterior muscles of the body vs the orthogonal, complexly  
100 arranged muscles of the leg segments. Outline of tergal plates (dashed line) relative to orthogonal  
101 muscle. (d) BF image of right half of adult *Parhyale*, sagittal dissection, innards removed, lateral  
102 view. Wire used to position sample (w). The same orthogonal muscles in b are visible as  
103 striations that continue above the wire. The precoxa forms a joint with the coxa, including a  
104 gliding articulation (arrow). The dorsal limit of the precoxa is unclear, but the most conservative  
105 estimate is to begin at the gliding joint (arrow) and follow the leg up to where it meets the  
106 adjacent leg, denoted by (<). By comparing (<) and (→), it can be seen that the precoxa  
107 protrudes quite a bit from the body wall. However, the precoxa appears to continue farther up the  
108 body wall (compare orthogonal muscle striations). (e) Posterior-lateral view of right T6, looking  
109 edge-on at tergal plate. The tergal plate (dotted outline) emerges from the precoxa (contiguous  
110 pink between ←, >, and ---). In c, d, coxa is red (coxal plate not shaded, to focus on joints), gills  
111 (teal) partially cut for visibility, basis is orange, precoxa is pink. Note that all three plates (tergal,  
112 coxal, and basal) form contiguous cuticle with their leg segment, i.e. there is no distinguishing  
113 suture.  
114  
115

116 (Fig. 1c)<sup>41-44</sup>. These data are explained if insects incorporated the ancestral precoxa and  
117 crustacean coxa into the body wall, with the precoxa epipod later forming the wing and the  
118 crustacean coxa epipod later forming the plate.

119 The results presented here may settle a long-standing debate concerning the origin of  
120 insect wings as derived from (a) the epipod of the leg, (b) the body wall, or, more recently, (c)  
121 from both (dual-origin hypothesis<sup>6,13</sup>). Our model accounts for all observations in favor of either  
122 the body wall or epipod origin of insect wing evolution, including the dorsal position of insect  
123 wings relative to their legs, the loss of ancestral leg segments in insects, the two-segmented  
124 morphology of the insect subcoxa in both embryos and adults, the complex musculature for  
125 flight, and the shared gene expression between wings and epipods. The realization that  
126 crustaceans have a precoxa accounts for the apparent “dual origin” of insect wings: much of  
127 what appears to be insect body wall is in fact the crustacean precoxa.

128 In fact, a number leg-associated outgrowths in arthropods are explained by this model, in  
129 addition to insect wings. The *Daphnia* carapace<sup>45</sup> is the epipod of the precoxa<sup>46</sup>; the *Oncopeltus*  
130 small plate outgrowth (Fig. 1c) is the epipod of the crustacean coxa; and the thoracic stylus of  
131 jumping bristletails (Fig. 4, st) is the epipod of the crustacean basis<sup>10,47</sup>. This also explains many  
132 insect abdominal appendages, like gills<sup>48</sup>, gin traps<sup>42</sup>, prolegs<sup>49</sup>, and sepsid fly appendages<sup>50</sup>,  
133 which are often proposed as de novo structures<sup>51-53</sup>. However, most insects form abdominal  
134 appendages as embryos<sup>48,54</sup>, some even with an epipod nub, but these fuse to the body wall  
135 before hatching to form the sternites<sup>39,47</sup>. This is supported by a re-analysis of the expression of  
136 *Sp6-9* and its paralog, *buttonhead*, in insect embryos<sup>23</sup>. According to the leg segment homology  
137 model presented here (Fig. 4), the paired dots of *btd* expression in each abdominal segment of  
138 insect embryos demonstrates that these appendages are comprised of three leg segments: the  
139 precoxa (pink), crustacean coxa (red), and insect coxa (orange), but not the trochanter (yellow),  
140 because *Dll* and *Dac* are not expressed. Thus, rather than de novo co-options, abdominal  
141 appendages were always there, persisting in a truncated, highly modified state, and de-repressed

142 in various lineages to form apparently novel structures. This provides a model for how insect  
 143 wings can be both homologous to the epipod of the crustacean precoxa, and yet not be  
 144 continuously present in the fossil record: epipod fields may persist in a truncated state, perhaps  
 145 only visible as a nub in the embryo. We propose this as a general mechanism for the origin of  
 146 novel structures that appear to be derived from serial homologs, rather than co-option.

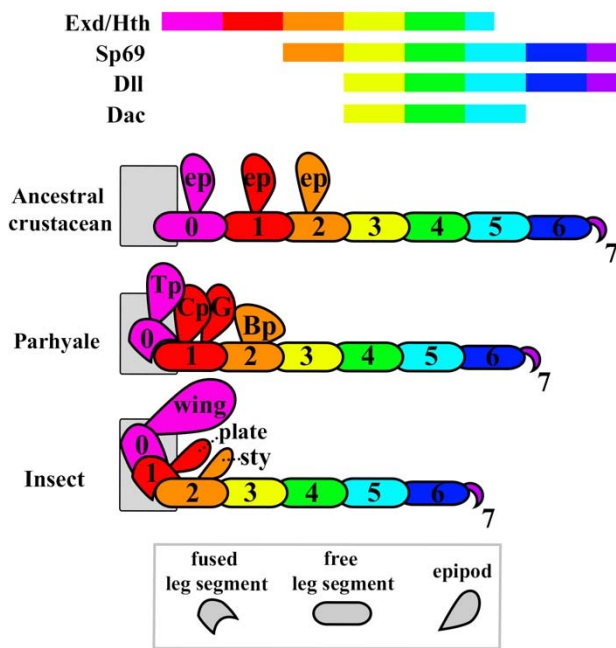

Fig 4. Gene expression alignment and proposed leg segment homologies (colors) between an ancestral crustacean, *Parhyale*, and insects. Ancestral precoxa epipod (ep), *Parhyale* tergal plate (Tp), and insect wing are homologous (pink). Ancestral coxa epipod, *Parhyale* coxal plate (Cp) and gill (G), and insect plate (see Fig. 1c) are homologous (red). Ancestral basis epipod, *Parhyale* basal plate (Bp), and jumping bristletail stylus (sty) are homologous (orange).

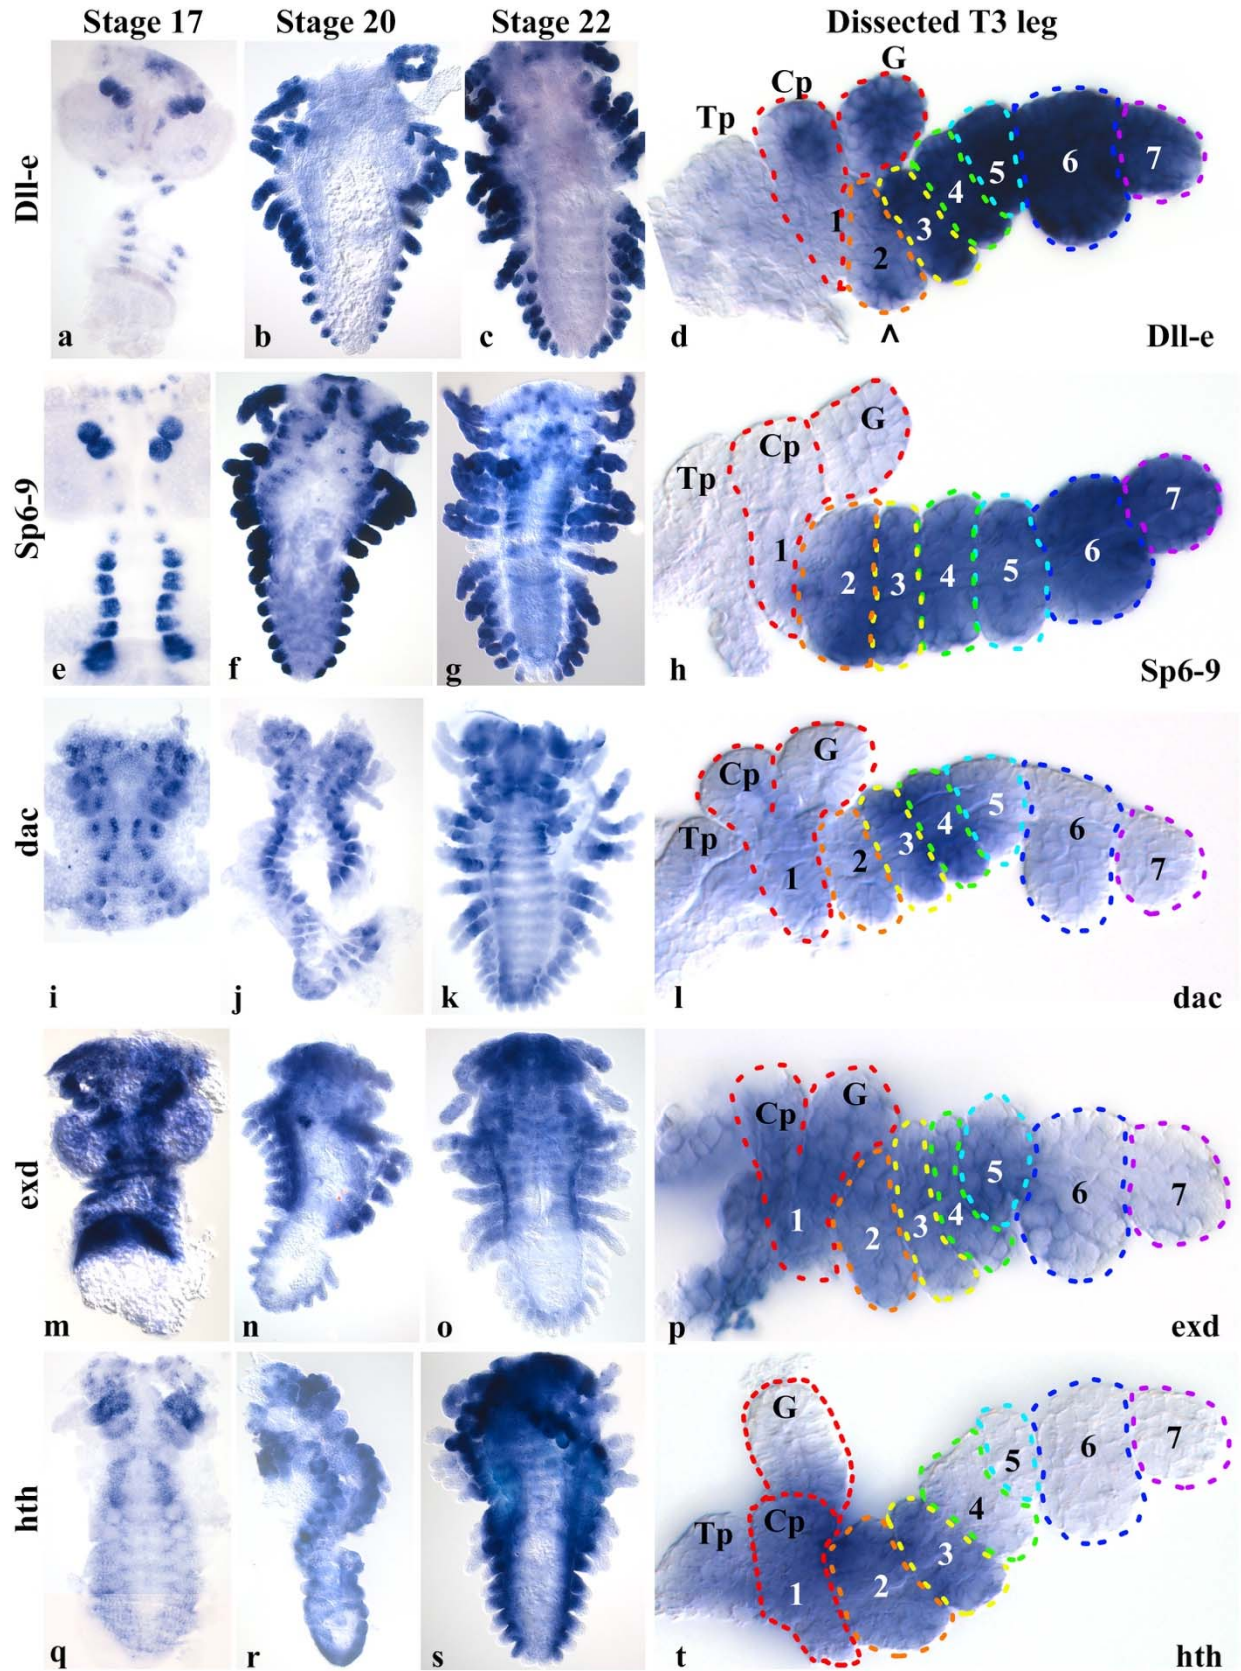

^ Fig S1. Expression of leg gap genes in whole embryos and dissected third thoracic legs (T3). (a – d): *Dll-e*. (e – h): *Sp6-9*. (i – l): *dac2*. (m – p): *exd*. (q – t): *hth*. Embryonic expression data for *Dll-e*<sup>19-21</sup>, *Sp6-9*<sup>23</sup>, and *exd* and *hth*<sup>31</sup> have been previously characterized, but not at the level of individual leg segments. (d) *Dll-e* is expressed in leg segments 3 – 7; in the interior of the tergal plate (Tp), coxal plate (Cp), and gill (G), where it may be playing a sensory role, similar to the expression of Dll that patterns sensory hairs in the *Drosophila* wing margin<sup>16</sup>; and marks the bristle (^) of leg segment 2. This bristle is deleted in *Dll-e* KO (compare Fig. 2a, b). (h) *Sp6-9* is expressed in leg segments 2 – 7. (l) *dac2* is expressed in leg segments 3 – 5. Expression in segment 5 may be stronger at other time points. (p) *exd* is expressed in the body wall through leg segment 5, and perhaps a little in 6. *Exd* is not expressed in the gill (not visible here). (t) *hth* is expressed in the body wall through leg segment 3. *Hth* is not expressed in the gill. Note that both insects and *Parhyale* share a peculiar disparity between *hth* expression and function, wherein *hth* knockout deletes one more leg segment than would be predicted by the *hth* expression domain.

148  
149  
150  
151  
152  
153  
154  
155  
156  
157  
158  
159



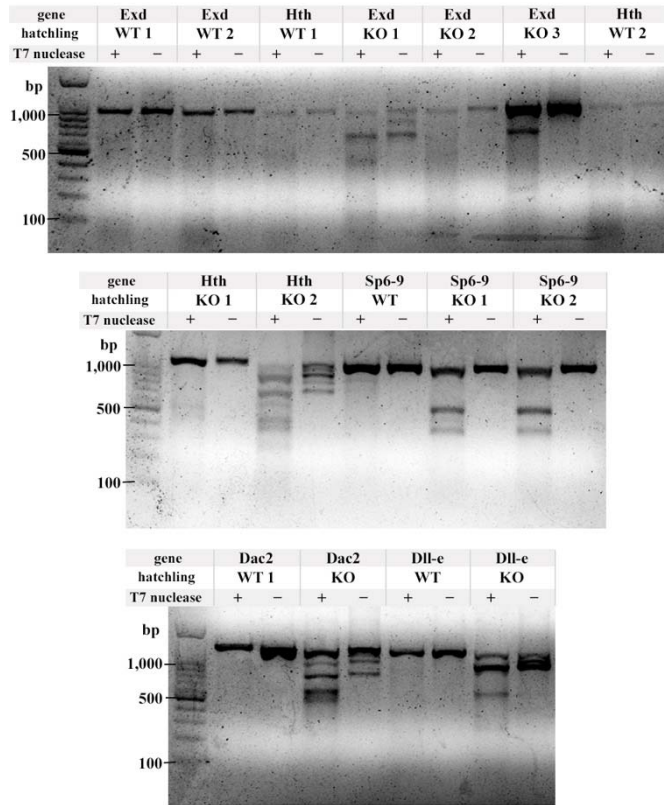

Fig. S2. T7 endonuclease assay to confirm CRISPR-Cas9 mutagenesis. For each gene, one or two wild type (WT) hatchlings were assayed, and one, two, or three KO hatchlings were assayed. T7 endonuclease was either added (+) or not added (-) to the heteroduplex mixture. In brief, a ~1kb region flanking the CRISPR-Cas9 target site by at least 300bp to either side was amplified by PCR from either WT or KO hatchlings. The purified PCR products were denatured, then slowly cooled to allow WT DNA and mutant DNA with indels to anneal, resulting in a “bubble” of unpaired DNA (heteroduplex) at the target site. T7 endonuclease was added to the (+) samples, incubated, and run on a 1.5% agarose gel. KO animals are mosaic, so if the target site was cut, the indels will cause heteroduplexes when annealed with either a WT strand, or a different indel. When a single deletion is present, each half of the cut heteroduplex adds up to approximately 1kb (see *Sp6-9* KO 1 and 2). Some deletions are large enough to be seen without the T7 endonuclease assay (see *Dll-e* KO), and some hatchlings had multiple deletions which produced multiple bands when cut with T7 (see *exd* KO 1, *hth* KO 2, *dac2* KO).

160

161

| Gene         | sgRNA | total injected | # dead | death % | # hatch w/phenotype | % phenotype of hatched |
|--------------|-------|----------------|--------|---------|---------------------|------------------------|
| <i>Dll-e</i> | 1+2   | 151            | 45     | 30%     | 57                  | 54%                    |
| <i>exd</i>   | 1+2   | 206            | 90     | 44%     | 86                  | 74%                    |
| <i>exd</i>   | 1     | 204            | 102    | 50%     | 84                  | 82%                    |
| <i>exd</i>   | 2     | 173            | 36     | 21%     | 85                  | 62%                    |
| <i>hth</i>   | 1+2   | 124            | 71     | 57%     | 32                  | 60%                    |
| <i>hth</i>   | 1     | 131            | 30     | 23%     | 36                  | 36%                    |
| <i>hth</i>   | 2     | 99             | 62     | 63%     | 22                  | 59%                    |
| <i>dac2</i>  | 1+2   | 80             | 28     | 35%     | 41                  | 79%                    |
| <i>dac2</i>  | 1     | 84             | 31     | 37%     | 9                   | 17%                    |
| <i>dac2</i>  | 2     | 88             | 18     | 20%     | 16                  | 23%                    |
| <i>Sp6-9</i> | 1+2   | 165            | 88     | 53%     | 51                  | 66%                    |
| <i>Sp6-9</i> | 1     | 54             | 22     | 41%     | 9                   | 28%                    |
| <i>Sp6-9</i> | 2     | 37             | 3      | 8%      | 15                  | 44%                    |

Table 1. CRISPR-Cas9 injection numbers. Two sgRNAs per gene were made, and either one or both were injected as indicated. Both guides for each gene gave the same phenotype. # dead is the number of embryos that did not survive to hatching. For each gene, sgRNA 1 and 2 produced the same phenotypes.

162  
163  
164  
165  
166  
167  
168  
169  
170

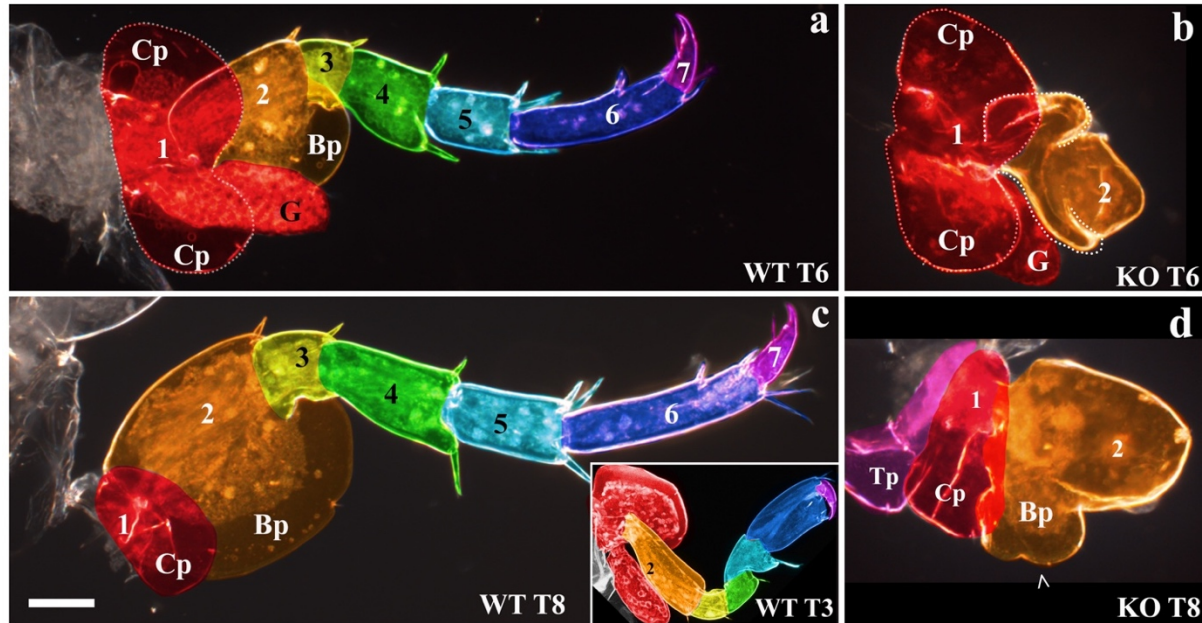

Fig S3. *Sp6-9* knockout sometimes causes a homeotic transformation of orange leg segment 2 towards a red leg segment 1 identity in jumping legs (thoracic legs T6 – 8). In WT jumping legs (a, c), orange leg segment 2 is very large and wide, due to the epipod on this segment (compare to skinny orange leg segment of WT T3 leg, inset in c). In WT T6 legs (a), the red coxal plate is bilobed, while in the WT T8 legs (c), the coxal plate is small and oval. In T6 *Sp6-9* KO (b), the epipod of orange leg segment 2 is bilobed, indicating a transformation towards red leg segment 1. In T8 *Sp6-9* KO (d), the large epipod of orange leg segment 2 has been reduced to the size and shape of the coxal plate, indicating a transformation towards red leg segment 1. Note that the tergal plates are unaffected (d, pink, Tp), which is similar to *Drosophila Sp6-9* knockouts, where the wings are unaffected<sup>24</sup>. The bilobed shape of the transformed T6 basal plate demonstrates that these are transformations towards a coxal plate rather than tergal plate, because the tergal plates are never bilobed. Therefore, these represent a homeotic transformation of one leg segment into another. This argues that the transformation of *Drosophila* leg to wing following loss of *Sp6-9* is also a transformation of one leg segment into another, and thus that insect wings are appendicular. Scale bar 50um.

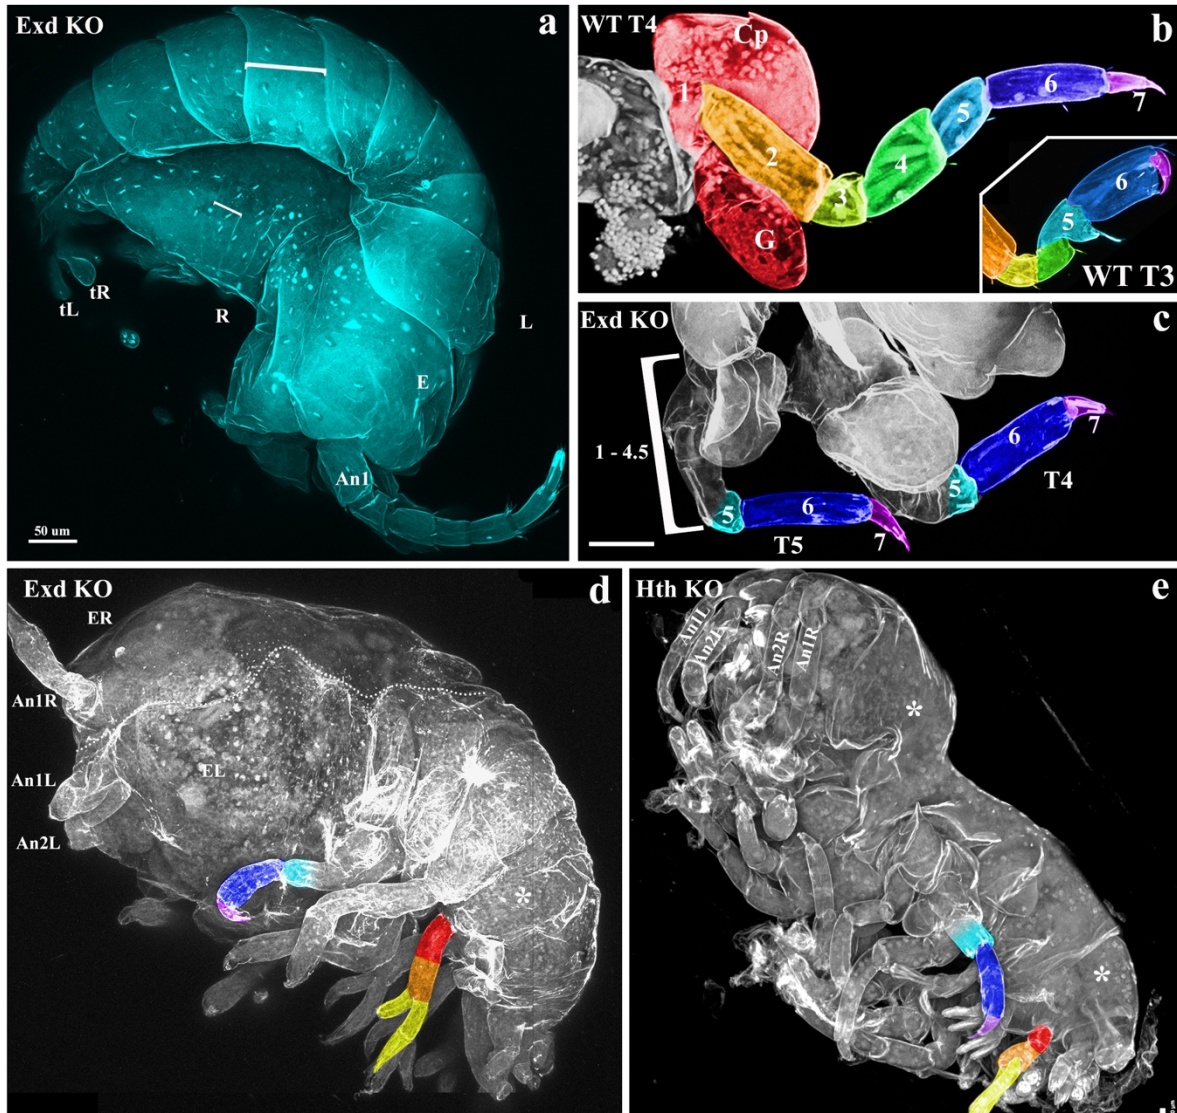

Fig. S4. *Exd* and *hth* phenotypes continued. (a) Body segment fusions/deletions in *exd* knockout whole hatchling. Confocal of unilaterally affected hatchling, dorsal view, anterior at bottom, posterior at left. Left side of animal (L) appears WT. The foreshortening of only the right (R) half of the body results in hatchlings with bodies twisted laterally into a nearly spiral shape. The tissue where the eye (E) would have been located is deleted, leaving a recess. Left first antenna (An1), left and right telson (tL, tR). White brackets compare the length of the body segments in right fused and left unfused segments. (b) WT T4 leg. Inset, WT T3 leg. Note broad shape of WT T3 blue leg segment 6 to skinny shape in WT T4/5. Also note triangle shape of WT T3 cyan leg segment 5 vs cylinder shape in WT T4/5, and presence of bristle in T3. (c) *exd* KO T4 and T5 legs. Loss of *exd* deletes/fuses leg segments 1 – 4 and proximal 5, leaving the distal half of leg segment 5 (indicated by fading cyan), and all of leg segments 6 and 7. Note that the joint between leg segments 5 and 6 is normal, but there is no apparent joint on the proximal side of leg segment 5. *Exd* KO also transforms the remaining T3 leg segments towards a T4/5 identity: *exd* KO T3 blue leg segment 6 is skinny, and cyan leg segment 5 is cylindrical and lacks the bristle (see Fig 2f). (d) Lateral view of *exd* KO hatchling. Hatchling died before cuticle growth. Dorsal midline indicated

with dashed white line. Left and right positions of eye in WT animals (EL, ER). (e) Lateral view of *hth* KO hatchling. *Exd* and *hth* KO produce the same body segment deletions/fusions, indicated with (\*), compare to WT body segments in a, Left side, and in Figs. 1A and 3B. Neither *exd* nor *hth* KO appears to affect abdominal legs, because all abdominal proximal leg segments (red and orange) are intact in the same severely affected hatchlings where all thoracic proximal leg segments are deleted/fused, leaving only the distal thoracic leg segments (cyan, blue, purple). Lack of phenotype in abdominal legs is not due to knockout mosaicism: *exd* and *hth* are indeed knocked out in the abdomens of these hatchlings, because the body segments of the abdomen are fused together (\*). Antenna (An).

171  
172  
173  
174  
175  
176  
177  
178  
179  
180  
181  
182  
183  
184  
185  
186  
187  
188  
189  
190  
191  
192  
193  
194  
195  
196  
197  
198  
199  
200  
201  
202  
203  
204  
205  
206

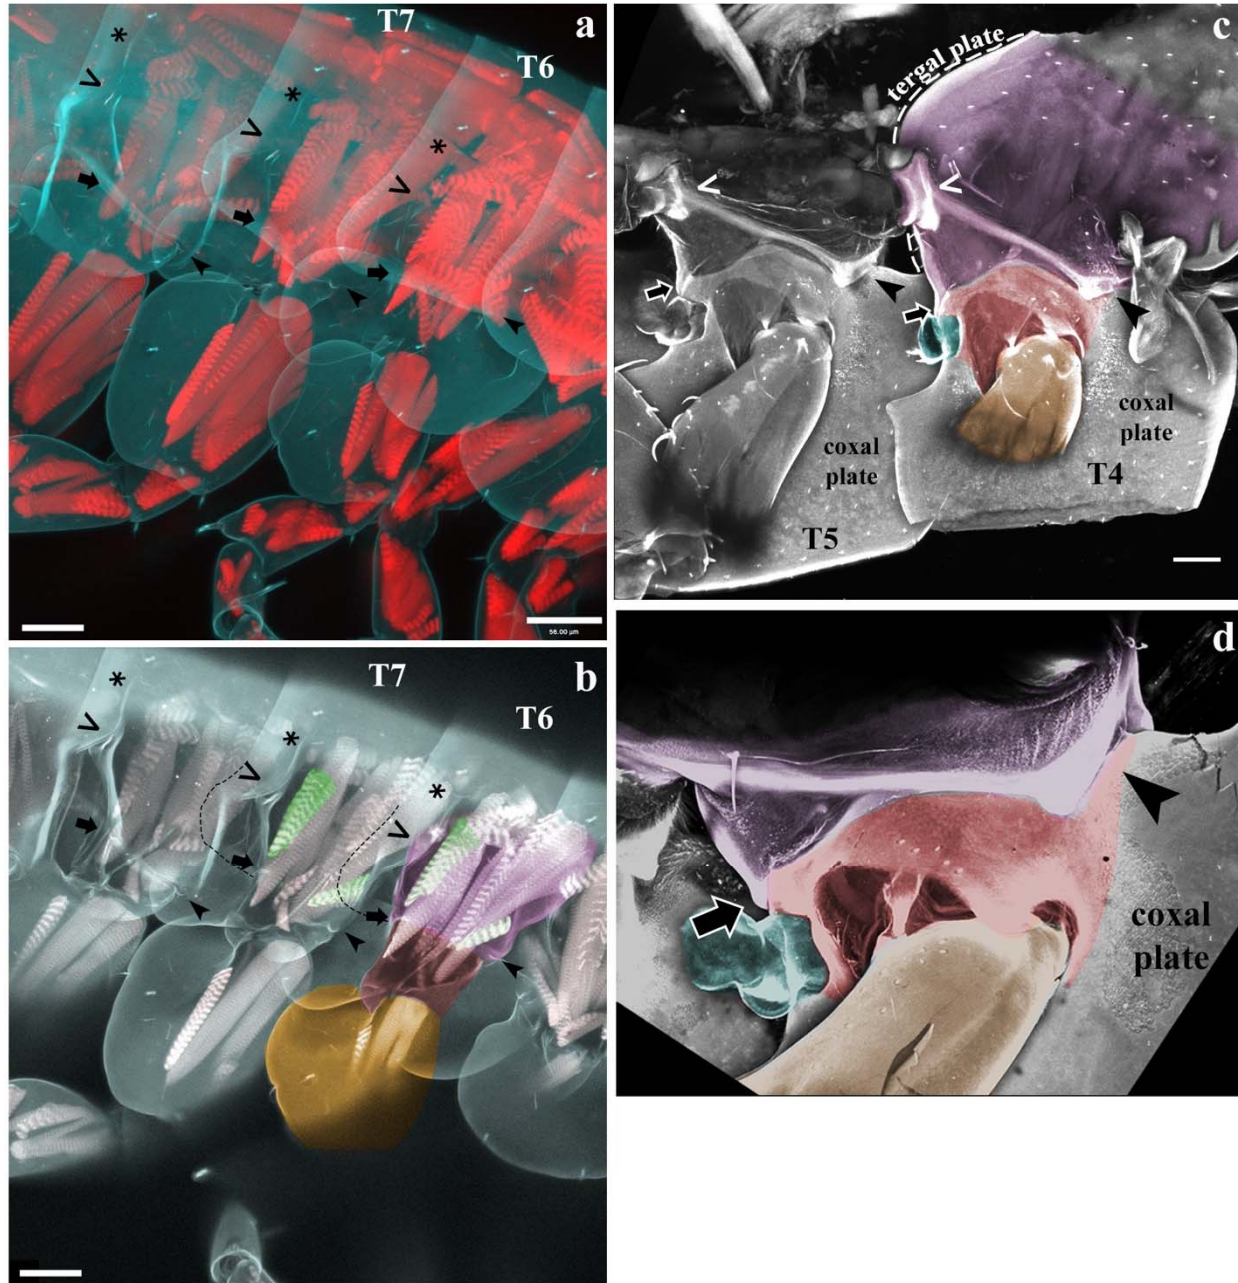

Fig. S5. *Parhyale* precoxa forms a true, muscled joint and extends musculature to another leg segment. Confocal images. (a) Phalloidin stain of muscle in right half of *Parhyale* hatchling. Contrast simple, anterior-posterior body muscles to orthogonal, complexly arranged leg muscles. No muscles cross the coxa-basis joint, as noted by Boxshall 1998. Note that all three plates (tergal, coxal, and basal) form contiguous cuticle with their leg segment, i.e. there is no distinguishing suture. (b) Optical section showing superficial muscles of right half. Confocal colors are partially desaturated: cuticle in grey-blue, muscle in grey-pink. The precoxa forms two articulations with the coxa: an anterior, bifurcated, load-bearing hinge articulation (arrowhead), and a posterior gliding articulation ( $\rightarrow$ ) (see also Fig. 3e). Coxa is red (coxal plate not shaded, to focus on joints), basis is orange, precoxa is magenta pink. Adjacent legs meet on their ventral sides at ( $<$ ) and on their dorsal sides at (\*). Outline of tergal plate (dashed line) relative to muscle

and joints shows that tergal plate emerges from precoxa. Muscles in green insert on the precoxa-coxa joint, indicating that this is a true joint, and not merely a point of flexure in the exoskeleton (annulation)<sup>12,35,36</sup>. The shorter, anterior muscle originates in the protruding precoxa to insert on the rim of the next leg segment, the coxa. This muscle is therefore an intrinsic muscle, a hallmark of a true leg segment<sup>12,35,36</sup>. (c) Confocal of dissected left half, medial view. Coxal plate and basis partially cut. The precoxa forms a joint with two articulations with the coxa: an anterior, bifurcated, load-bearing hinge articulation (arrowhead), and a posterior gliding articulation (arrow). Orthogonal muscles visible as striations on T4 precoxa. (d) Close-up of left T4, medial-anterior view, showing bifurcated hinge articulation.

207  
208  
209  
210  
211  
212  
213  
214  
215  
216  
217  
218  
219  
220  
221  
222  
223  
224  
225  
226  
227  
228  
229  
230  
231  
232  
233  
234  
235  
236  
237  
238  
239  
240  
241  
242  
243

244  
245  
246  
247  
248  
249  
250  
251  
252  
253  
254  
255  
256  
257  
258  
259  
260  
261  
262  
263  
264  
265  
266  
267  
268  
269  
270  
271  
272

## METHODS

### BIOINFORMATICS

Partial or complete sequences for *Parhyale Dll*, *Sp6-9*, *Exd*, and *Hth* have been previously identified. These were >99% identical at the nucleotide level to sequences in the *Parhyale* assembled transcriptome. In order to confirm their orthology, identify potential *Parhyale* paralogs and identify *Parhyale dac*, we ran reciprocal best Blast hit searches. For each gene, orthologs from several arthropods and vertebrates were downloaded from NCBI and EMBL and aligned against the *Parhyale* transcriptome<sup>55</sup> using standalone NCBI blastp. The *Parhyale* hits with the lowest E-values were used to run a blastp against the NCBI database, restricted to Arthropoda. We confirmed that the original set of orthologs from several arthropods were the best hits to our *Parhyale* candidates (i.e. were each other's reciprocal best Blast hits). These reciprocal best Blast hits are listed in the tables below, and were deposited in Genbank under Accession Numbers MG457799 - MG457804.

No *Parhyale* buttonhead/Sp5 was recovered in the assembled transcriptome. Buttonhead/Sp5 was also not found in the genome of the related amphipod *Hyaella azteca*. The assembled transcriptome only recovered fragments of *Parhyale* Sp1-4, so the previously sequenced *Parhyale* Sp1-4 (CBH30980.1) was used for the table below (asterisk).

*Parhyale* has three Dll paralogs, which appear to be an amphipod-specific duplication, because a related amphipod, *Hyaella azteca*, also has these same three Dll paralogs. The three *Parhyale* Dll paralogs had the lowest E-values to all Dll orthologs examined, but which of the three *Parhyale* Dll paralogs had the lowest E-value was variable, as expected for a clade-specific duplication.

The coding region for *Parhyale* exd and hth in the assembled transcriptome are longer than those previously identified. Exd is 204 amino acids longer, and hth is 166 amino acids longer. This explains the higher-than-expected E-values between the *Parhyale* exd and hth sequences identified previously and the *Parhyale* exd and hth sequences used in this study.

| Extradenticle                  |                              |           |
|--------------------------------|------------------------------|-----------|
| Query id                       | Subject id                   | E-value   |
| Daphnia_pulex exd EFX62563.1   | <i>Parhyale</i> exd MG457802 | 8.00E-177 |
| Drosophila exd AAF48555.1      | <i>Parhyale</i> exd MG457802 | 7.00E-173 |
| Hyaella exd XP_018011298.1     | <i>Parhyale</i> exd MG457802 | 2.00E-166 |
| <i>Parhyale</i> exd CAO98909.1 | <i>Parhyale</i> exd MG457802 | 6.00E-126 |
| Tribolium exd NP_001034501.1   | <i>Parhyale</i> exd MG457802 | 1.00E-173 |
| Homo Pbx1 NP_002576.1          | <i>Parhyale</i> exd MG457802 | 3.00E-166 |

273  
274

| Homothorax                 |                              |           |
|----------------------------|------------------------------|-----------|
| Query id                   | Subject id                   | E-value   |
| Daphnia hth EFX75948.1     | <i>Parhyale</i> hth MG457803 | 0         |
| Drosophila hth NP_476578.3 | <i>Parhyale</i> hth MG457803 | 6.00E-179 |
| Homo Meis2 AAH07202.1      | <i>Parhyale</i> hth MG457803 | 1.00E-148 |



|                                |                              |   |
|--------------------------------|------------------------------|---|
| Hyaella hth XP_018016731.1     | <i>Parhyale</i> hth MG457803 | 0 |
| <i>Parhyale</i> hth CAO98908.1 | <i>Parhyale</i> hth MG457803 | 0 |
| Tribolium hth NP_001034489.1   | <i>Parhyale</i> hth MG457803 | 0 |

275  
276

| Sp6-9, Sp1-4, buttonhead/Sp5     |                                    |           |
|----------------------------------|------------------------------------|-----------|
| Query id                         | Subject id                         | E-value   |
| Drosophila btd NP_511100.1       | <i>Parhyale</i> Sp6-9 MG457804     | 4.00E-47  |
| Drosophila Sp1-4 NM_142975.3     | * <i>Parhyale</i> Sp1-4 CBH30980.1 | 5.00E-62  |
| Drosophila Sp6-9 NP_727360.1     | <i>Parhyale</i> Sp6-9 MG457804     | 6.00E-109 |
| Homo Sp4 NP_003103.2             | * <i>Parhyale</i> Sp1-4 CBH30980.1 | 2.00E-66  |
| Homo Sp5 NP_001003845.1          | <i>Parhyale</i> Sp6-9 MG457804     | 7.00E-62  |
| Homo Sp8 NP_874359.2             | <i>Parhyale</i> Sp6-9 MG457804     | 3.00E-105 |
| Hyaella Sp1-4 XP_018012207.1     | * <i>Parhyale</i> Sp1-4 CBH30980.1 | 0         |
| Hyaella Sp6-9 XP_018014881.1     | <i>Parhyale</i> Sp6-9 MG457804     | 0         |
| <i>Parhyale</i> Sp1-4 CBH30980.1 | * <i>Parhyale</i> Sp1-4 CBH30980.1 | 0         |
| <i>Parhyale</i> Sp6-9 CBH30981.1 | <i>Parhyale</i> Sp6-9 MG457804     | 0         |
| Tribolium btd NP_001107792.1     | <i>Parhyale</i> Sp6-9 MG457804     | 7.00E-59  |
| Tribolium Sp1-4 XP_015833716.1   | <i>Parhyale</i> Sp6-9 MG457804     | 3.00E-62  |
| Tribolium Sp6-9 XP_008198341.1   | <i>Parhyale</i> Sp6-9 MG457804     | 6.00E-159 |

277  
278

| Distalless                             |                 |           |
|----------------------------------------|-----------------|-----------|
| Query id                               | Subject id      | E-value   |
| Drosophila Dll ACL83212.1              | PhDII2          | 2.00E-54  |
| Drosophila Dll ACL83212.1              | PhDII1          | 2.00E-48  |
| Drosophila Dll ACL83212.1              | PhDIIe MG457801 | 4.00E-42  |
| Homo DLX-2 AAB40902.1                  | PhDIIe MG457801 | 3.00E-35  |
| Homo DLX-2 AAB40902.1                  | PhDII2          | 6.00E-35  |
| Homo DLX-2 AAB40902.1                  | PhDII1          | 3.00E-34  |
| Hyaella DLX-2 XP_018023955.1           | PhDIIe MG457801 | 0         |
| Hyaella DLX-2 XP_018023955.1           | PhDII1          | 1.00E-49  |
| Hyaella DLX-2 XP_018023955.1           | PhDII2          | 3.00E-45  |
| Hyaella DLX-6 XP_018023956.1           | PhDII2          | 4.00E-102 |
| Hyaella DLX-6 XP_018023956.1           | PhDII1          | 1.00E-51  |
| Hyaella DLX-6 XP_018023956.1           | PhDIIe MG457801 | 1.00E-40  |
| Hyaella unchar. protein XP_018023484.1 | PhDII1          | 8.00E-83  |
| Hyaella unchar. protein XP_018023484.1 | PhDII2          | 0.89      |
| <i>Parhyale</i> Dll-e ACT78885.1       | PhDIIe MG457801 | 0         |

|                                  |                 |          |
|----------------------------------|-----------------|----------|
| <i>Parhyale</i> DII-e ACT78885.1 | PhDII1          | 7.00E-48 |
| <i>Parhyale</i> DII-e ACT78885.1 | PhDII2          | 1.00E-44 |
| <i>Tribolium</i> DII AAG39634.1  | PhDII1          | 7.00E-48 |
| <i>Tribolium</i> DII AAG39634.1  | PhDII2          | 1.00E-46 |
| <i>Tribolium</i> DII AAG39634.1  | PhDIIe MG457801 | 5.00E-39 |

279  
280

| Dachshund                            |                               |           |
|--------------------------------------|-------------------------------|-----------|
| Query id                             | Subject id                    | E-value   |
| <i>Daphnia pulex</i> dac EFX90187.1  | <i>Parhyale</i> Dac1 MG457799 | 3.00E-67  |
| <i>Drosophila</i> dac AAF53538.3     | <i>Parhyale</i> Dac2 MG457800 | 2.00E-64  |
| Homo dach2 Q96NX9                    | <i>Parhyale</i> Dac1 MG457799 | 4.00E-52  |
| <i>Hyaella</i> Dac1 XP_018011787.1   | <i>Parhyale</i> Dac1 MG457799 | 7.00E-109 |
| <i>Hyaella</i> Dac1 XP_018011787.1   | <i>Parhyale</i> Dac2 MG457800 | 2.00E-55  |
| <i>Hyaella</i> Dac2 XP_018011801.1   | <i>Parhyale</i> Dac2 MG457800 | 0         |
| <i>Hyaella</i> Dac2 XP_018011801.1   | <i>Parhyale</i> Dac1 MG457799 | 1.00E-59  |
| <i>Tribolium</i> dac1 XP_015834662.1 | <i>Parhyale</i> Dac2 MG457800 | 6.00E-72  |

281  
282  
283  
284  
285

#### IN SITU PRIMER SEQUENCES

| Primer name   | product size | seq                   |
|---------------|--------------|-----------------------|
| hth FORWARD   | 941          | GTTATGGGCTCCGTACCTGA  |
| hth REVERSE   | 941          | GCCAGCTGTTTCTTCTGGTC  |
| exd FORWARD   | 734          | AGCGAGTCCTCAACAAAGGA  |
| exd REVERSE   | 734          | AGGAGGCCGTGTGCTATTCTG |
| DII FORWARD   | 725          | TGGGTCCAGTTCAACCTCTC  |
| DII REVERSE   | 725          | GACATCGTCCTCCAAAGCAT  |
| dac 1 FORWARD | 638          | GGAGAGCAGAGGGGACTTTT  |
| dac 1 REVERSE | 638          | CCACTTCACGACCTCCTCAT  |
| dac 2 FORWARD | 699          | CTTCAACCCCTCCAGTACA   |
| dac 2 REVERSE | 699          | TGTCTGTCGTCGTCTTCTG   |
| Sp6-9 FORWARD | 789          | CAAATGGCTCGCATGTATTG  |
| Sp6-9 REVERSE | 789          | CAGTGCGTTCAAACCTTCAA  |

286  
287  
288  
289  
290

291

## 292 CLONING AND RNA PROBE SYNTHESIS

293 Total RNA was extracted from a large pool of *Parhyale* embryos at multiple stages of  
294 embryogenesis, from Stages 12 to 26 using Trizol. cDNA was generated using Superscript III.  
295 Primers were generated with Primer3 (<http://bioinfo.ut.ee/primer3-0.4.0>), with a preferred  
296 product size of 700bp, and did not include the DNA binding domain. Inserts were amplified with  
297 Platinum Taq (ThermoFisher 10966026), ligated into pGem T-Easy vectors (ProMega A1360),  
298 and transformed into E coli. The resulting plasmids were cleaned with a QiaPrep mini-prep kit  
299 (Qiagen A1360), and sequenced to verify the correct insert and determine sense and anti-sense  
300 promoters. In situ templates were generated by PCR from these plasmids using M13F/R primers  
301 and purified with Qiagen PCR Purification kit (Qiagen 28104). The resulting PCR products were  
302 used to make DIG-labeled RNA probes (Roche 11175025910) using either T7 or Sp6 RNA  
303 polymerase. RNA probes were precipitated with LiCl, resuspended in water, and run on an  
304 agarose gel to check that probes were the correct size, and concentration was determined using a  
305 Nanodrop 10000. Probes were used at 1-5ng/uL concentration.

306

## 307 IN SITU PROTOCOL

308 Embryo collection, fixation, and dissection as previously described<sup>56</sup>. In situ performed as  
309 previously described<sup>57</sup>. In brief, embryos were fixed in 4% paraformaldehyde (PFA) in artificial  
310 seawater for 45 minutes, dehydrated to methanol, and stored overnight at -20C to discourage  
311 embryos from floating in later hybridization solution (Hyb) step. Embryos were rehydrated to  
312 1xPBS with 0.1% Tween 20 (PTw), post-fixed for 30 minutes in 9:1 PTw:PFA, and washed in  
313 PTw. Embryos were incubated in Hyb at 55C for at least 36 hours. Embryos were blocked with  
314 5% normal goat serum and 1x Roche blocking reagent (Roche 11096176001) in PTw for 30  
315 minutes. Sheep anti-DIG-AP antibody (Roche 11093274910) was added at 1:2000 and incubated  
316 for 2 hours at room temperature. Embryos were developed in BM Purple (Roche 11442074001)  
317 for a few hours to overnight. After embryos were sufficiently developed, they were dehydrated to  
318 methanol to remove any pink background, then rehydrated to PTw. Embryos were then moved to  
319 1:1 PBS:glycerol with 0.1mg/mL DAPI, then 70% glycerol in PBS.

320

## 321 CRISPR-CAS9 GUIDE RNA GENERATION, INJECTION, AND IMAGING

322 Guide RNAs were generated using ZiFit<sup>58,59</sup> as previously described<sup>60</sup>. sgRNAs were ordered  
323 from Synthego. Injection mixes had a final concentration of 333ng/uL Cas9 protein, 150ng/uL  
324 sgRNA (for both single and double guide injection mixes), and 0.05% phenol red for  
325 visualization during injection, all suspended in water. One- or two-cell embryos were injected  
326 with approximately 40 – 60 picoliters of sgRNA mixture as previously described<sup>60</sup>. Resulting  
327 knockout hatchlings were fixed in 4% paraformaldehyde in artificial seawater at 4C for 1 – 2  
328 days, then moved to 70% glycerol in 1xPBS. Dissected hatchling limbs were visualized with  
329 Zeiss 700 and 780 confocal microscopes using the autofluorescence in the DAPI channel. Z-  
330 stacks were assembled with Volocity. Hatchling images were desaturated, levels adjusted, and  
331 false-colored using Overlay with Adobe Photoshop CS6.

332

## 333 T7 ENDONUCLEASE I ASSAY

334 Genomic primers were designed using Primer3, and flanked the target site by at least 400bp to  
335 either side. DNA isolation and subsequent PCR amplification of the region of interest was  
336 modified from previously described protocols<sup>61</sup>. Genomic DNA was amplified directly from

337 fixed hatchlings in 70% glycerol using ExTaq (Takara RR001A). The resulting PCR products  
338 were purified with the Qiaquick PCR purification kit (Qiagen 28104). Heteroduplexes were  
339 annealed and digested by T7 endonuclease I according to NEB protocols (NEB M0302L). The  
340 digested products were run out on a 1.5% agarose gel. Genomic primers used for the T7  
341 endonuclease I assay are listed below.

342

#### 343 GENOMIC DNA PRIMERS

344

| Primer name | product size | seq                    | 345 |
|-------------|--------------|------------------------|-----|
| exd left    | 907          | CTTGAGATTCGTTTCAGGTGCA | 346 |
| exd right   | 907          | TTCTCCCCAGTTCCTTGCAA   | 347 |
| hth left    | 943          | TGTTTCGTGTACCCGCAGAT   | 348 |
| hth right   | 943          | TCGGGCATACTAGAAGGCAG   | 349 |
| Sp6-9 left  | 935          | GCCCAGCTACTAACGATTTTCA | 350 |
| Sp6-9 right | 935          | GATCCGCTTCCTGACAGTTG   | 351 |
| Dll-e left  | 922          | GGAATGGTGAAGGAAGAGCG   | 352 |
| Dll-e right | 922          | TCAGCAGTGCAGACTCATGT   | 353 |
| dac2 left   | 983          | CACGCGACACTCATAACAG    | 354 |
| dac2 right  | 983          | GATGCTCCTCCCACCGAATA   | 355 |

359

360

#### 361 PRECOXA PHYLOGENY REFERENCES

362 Branchiura<sup>62-64</sup>. Mystacocarida<sup>65,66</sup>. Ostracoda<sup>46,65,67,68</sup>. Copepoda<sup>65,69,70</sup>. Cirripedia<sup>46</sup>.  
363 Decapoda<sup>65,71,72</sup>. Leptostraca<sup>46</sup>. Stomatopod<sup>62,73</sup>. Amphipoda<sup>74,75</sup>. Cephalocarida<sup>62,76</sup>.  
364 Notostraca<sup>46</sup>. Spinicaudata<sup>77</sup>. Remipedia<sup>37,65</sup>. Collembola<sup>37</sup>. Insecta<sup>2,3,12,38,39,78</sup>.

365

366

367

#### 368 AUTHOR CONTRIBUTIONS

369 H.S.B. and N.H.P. conceived of the experiments. H.S.B. performed all experiments, conceived  
370 of model, and wrote the manuscript. N.H.P. edited and revised the manuscript.

371

372

373

374

375

#### 376 References

377

378 1. Matsuda, R. Morphology and evolution of the insect thorax. *Memoirs of the*  
379 *Entomological Society of Canada* **Volume 102**, 5–431 (1970).

380 2. Snodgrass, R. E. Morphology and mechanism of the insect thorax. *Smithsonian*  
381 *Miscellaneous Collections* **80**, (1927).

382 3. Deuve, T. The epipleural field in hexapods. *Annales De La Societe Entomologique*  
*De France* **37**, 195–231 (2001).

- 383 4. Kukalová-Peck, J. Origin of the insect wing and wing articulation from the  
384 arthropodan leg. *Can. J. Zool.* **61**, 1618–1669 (1983).
- 385 5. Snodgrass, R. E. *Principles of insect morphology*. (McGraw-Hill Book Company,  
386 Inc, 1935).
- 387 6. Clark-Hachtel, C. M. & Tomoyasu, Y. Exploring the origin of insect wings from an  
388 evo-devo perspective. *Curr Opin Insect Sci* **13**, 77–85 (2016).
- 389 7. Requena, D. *et al.* Origins and Specification of the Drosophila Wing. *Current*  
390 *Biology* **27**, 3826–3836.e5 (2017).
- 391 8. Prokop, J. *et al.* Paleozoic Nymphal Wing Pads Support Dual Model of Insect Wing  
392 Origins. *Curr. Biol.* **27**, 263–269 (2017).
- 393 9. Mashimo, Y. & Machida, R. Embryological evidence substantiates the subcoxal  
394 theory on the origin of pleuron in insects. *Sci Rep* **7**, 1–9 (2017).
- 395 10. Niwa, N. *et al.* Evolutionary origin of the insect wing via integration of two  
396 developmental modules. *Evol. Dev.* **12**, 168–176 (2010).
- 397 11. Averof, M. & Cohen, S. M. Evolutionary origin of insect wings from ancestral gills.  
398 *Nature* **385**, 627–630 (1997).
- 399 12. Boxshall, G. A. The evolution of arthropod limbs. *Biol. Rev.* **79**, 253–300 (2004).
- 400 13. Clark-Hachtel, C. M. & Tomoyasu, Y. Two sets of wing homologs in the  
401 crustacean, *Parhyale hawaiiensis*. *bioRxiv*  
402 (2017). doi:10.1101/236281
- 403 14. Estella, C. A dynamic network of morphogens and transcription factors patterns the  
404 fly leg. *Curr. Top. Dev. Biol.* **98**, 173–198 (2012).
- 405 15. Estella, C., Rieckhof, G., Calleja, M. & Morata, G. The role of buttonhead and Spl  
406 in the development of the ventral imaginal discs of *Drosophila*. *Development* **130**,  
407 5929–5941 (2003).
- 408 16. Campbell, G. & Tomlinson, A. The roles of the homeobox genes *aristaless* and  
409 *Distal-less* in patterning the legs and wings of *Drosophila*. *Development* **125**, 4483–  
410 4493 (1998).
- 411 17. Angelini, D. R. & Kaufman, T. C. Functional analyses in the hemipteran *Oncopeltus*  
412 *fasciatus* reveal conserved and derived aspects of appendage patterning in insects.  
413 *Developmental Biology* **271**, 306–321 (2004).
- 414 18. Beermann, A. *et al.* The Short antennae gene of *Tribolium* is required for limb  
415 development and encodes the orthologue of the *Drosophila* *Distal-less* protein.  
416 *Development* **128**, 287–297 (2001).
- 417 19. Serano, J. M. *et al.* Comprehensive analysis of Hox gene expression in the  
418 amphipod crustacean *Parhyale hawaiiensis*. *Developmental Biology* **409**, 297–309  
419 (2015).
- 420 20. Browne, W. E., Price, A. L., Gerberding, M. & Patel, N. H. Stages of embryonic  
421 development in the amphipod crustacean, *Parhyale hawaiiensis*. *genesis* **42**, 124–149  
422 (2005).
- 423 21. Liubicich, D. M. *et al.* Knockdown of *Parhyale* Ultrabithorax recapitulates  
424 evolutionary changes in crustacean appendage morphology. *Proc. Natl. Acad. Sci.*  
425 *U.S.A.* **106**, 13892–13896 (2009).
- 426 22. Beermann, A., Aranda, M. & Schröder, R. The Sp8 zinc-finger transcription factor  
427 is involved in allometric growth of the limbs in the beetle *Tribolium castaneum*.  
428 *Development* **131**, 733–742 (2004).

- 429 23. Schaeper, N. D., Prpic, N.-M. & Wimmer, E. A. A clustered set of three Sp-family  
430 genes is ancestral in the Metazoa: evidence from sequence analysis, protein domain  
431 structure, developmental expression patterns and chromosomal location. *BMC Evol.*  
432 *Biol.* **10**, 88 (2010).
- 433 24. Estella, C. & Mann, R. S. Non-Redundant Selector and Growth-Promoting  
434 Functions of Two Sister Genes, buttonhead and Sp1, in Drosophila Leg  
435 Development. *PLoS Genet* **6**, e1001001 (2010).
- 436 25. Mardon, G., Solomon, N. M. & Rubin, G. M. dachshund encodes a nuclear protein  
437 required for normal eye and leg development in Drosophila. *Development* **120**,  
438 3473–3486 (1994).
- 439 26. Tavsanlı, B. C. *et al.* Structure–function analysis of the Drosophila retinal  
440 determination protein Dachshund. *Developmental Biology* **272**, 231–247 (2004).
- 441 27. Mito, T. *et al.* Divergent and conserved roles of extradenticle in body segmentation  
442 and appendage formation, respectively, in the cricket *Gryllus bimaculatus*.  
443 *Developmental Biology* **313**, 67–79 (2008).
- 444 28. Ronco, M. *et al.* Antenna and all gnathal appendages are similarly transformed by  
445 homothorax knock-down in the cricket *Gryllus bimaculatus*. *Developmental Biology*  
446 **313**, 80–92 (2008).
- 447 29. Rauskolb, C., Smith, K. M., Peifer, M. & Wieschaus, E. extradenticle determines  
448 segmental identities throughout Drosophila development. *Development* **121**, 3663–  
449 3673 (1995).
- 450 30. Wu, J. & Cohen, S. M. Proximodistal axis formation in the Drosophila leg:  
451 subdivision into proximal and distal domains by Homothorax and Distal-less.  
452 *Development* **126**, 109–117 (1999).
- 453 31. Prpic, N.-M. & Telford, M. J. Expression of homothorax and extradenticle mRNA in  
454 the legs of the crustacean *Parhyale hawaiiensis*: evidence for a reversal of gene  
455 expression regulation in the pancrustacean lineage. *Dev Genes Evol* **218**, 333–339  
456 (2008).
- 457 32. Rieckhof, G. E., Casares, F., Ryoo, H. D., Abu-Shaar, M. & Mann, R. S. Nuclear  
458 translocation of extradenticle requires homothorax, which encodes an extradenticle-  
459 related homeodomain protein. *Cell* **91**, 171–183 (1997).
- 460 33. Casares, F. & Mann, R. S. The ground state of the ventral appendage in Drosophila.  
461 *Science* **293**, 1477–1480 (2001).
- 462 34. Hessler, R. R. The Structural Morphology of Walking Mechanisms in  
463 Eumalacostracan Crustaceans. *Philosophical Transactions of the Royal Society B:*  
464 *Biological Sciences* **296**, 245–298 (1982).
- 465 35. Boxshall, G. *Arthropod Limbs and their Development. Arthropod Biology and*  
466 *Evolution* 241–267 (2013). doi:10.1007/978-3-662-45798-6\_11
- 467 36. Shultz, J. W. Morphology of locomotor appendages in Arachnida: evolutionary  
468 trends and phylogenetic implications. *Zool J Linn Soc* **97:1-56**, (1989).
- 469 37. Bäcker, H., Fanenbruck, M. & Wägele, J. W. A forgotten homology supporting the  
470 monophyly of Tracheata: The subcoxa of insects and myriapods re-visited.  
471 *Zoologischer Anzeiger - A Journal of Comparative Zoology* **247**, 185–207 (2008).
- 472 38. Kobayashi, Y. Formation of Subcoxae-1 and 2 in Insect Embryos: The Subcoxal  
473 Theory Revisited. *Proc Arthropod Embryol Soc Jpn* **48**, 33–38 (2017).
- 474 39. Kobayashi, Y., Niikura, K., Oosawa, Y. & Takami, Y. Embryonic development of

- 475 Carabus insulicola (Insecta, Coleoptera, Carabidae) with special reference to  
476 external morphology and tangible evidence for the subcoxal theory. *J. Morphol.*  
477 **274**, 1323–1352 (2013).
- 478 40. Hansen, H. J. *Studies on the Arthropoda III. On the Comparative Morphology of the*  
479 *Appendages in the Arthropoda. B. Crustacea (Supplement), Insecta, Myriapoda*  
480 *and ....* (Copenhagen: Gyldendalske Boghandel, 1930).
- 481 41. Clark-Hachtel, C. M., Linz, D. M. & Tomoyasu, Y. Insights into insect wing origin  
482 provided by functional analysis of vestigial in the red flour beetle, *Tribolium*  
483 *castaneum*. *Proc. Natl. Acad. Sci. U.S.A.* **110**, 16951–16956 (2013).
- 484 42. Ohde, T., Yaginuma, T. & Niimi, T. Insect morphological diversification through  
485 the modification of wing serial homologs. *Science* **340**, 495–498 (2013).
- 486 43. Medved, V. *et al.* Origin and diversification of wings: Insights from a neopteran  
487 insect. *Proc. Natl. Acad. Sci. U.S.A.* **112**, 15946–15951 (2015).
- 488 44. Wang, D. *et al.* spalt is functionally conserved in *Locusta* and *Drosophila* to promote  
489 wing growth. *Sci Rep* **7**, 1–9 (2017).
- 490 45. Shiga, Y. *et al.* Repeated co-option of a conserved gene regulatory module  
491 underpins the evolution of the crustacean carapace, insect wings and other flat  
492 outgrowths. doi:10.1101/160010
- 493 46. Hansen, H. J. *Studies on Arthropoda. II. At the Expense of the Rask-Ørsted Fund.*  
494 (Copenhagen: Gyldendalske Boghandel, 1925).
- 495 47. Bitsch, J. The controversial origin of the abdominal appendage-like processes in  
496 immature insects: Are they true segmental appendages or secondary outgrowths?  
497 (Arthropoda hexapoda). *J. Morphol.* **273**, 919–931 (2012).
- 498 48. Komatsu, S. & Kobayashi, Y. Embryonic development of a whirligig beetle,  
499 *Dineutus mellyi*, with special reference to external morphology (insecta: Coleoptera,  
500 Gyrinidae). *J. Morphol.* **273**, 541–560 (2012).
- 501 49. Suzuki, Y., Squires, D. C. & Riddiford, L. M. Developmental Biology.  
502 *Developmental Biology* **326**, 60–67 (2009).
- 503 50. Bowsher, J. H. & Nijhout, H. F. Partial co-option of the appendage patterning  
504 pathway in the development of abdominal appendages in the sepsid fly *Themira*  
505 *biloba*. *Dev Genes Evol* **219**, 577–587 (2010).
- 506 51. Hoch, H. *et al.* Non-sexual abdominal appendages in adult insects challenge a 300  
507 million year old bauplan. *Curr. Biol.* **24**, R16–7 (2014).
- 508 52. Angelini, D. R. & Kaufman, T. C. Comparative developmental genetics and the  
509 evolution of arthropod body plans. *Annu. Rev. Genet.* **39**, 95–119 (2005).
- 510 53. Moczek, A. P. On the origins of novelty in development and evolution. *Bioessays*  
511 **30**, 432–447 (2008).
- 512 54. Matsuda, R. *Morphology and Evolution of the Insect Abdomen.* (Elsevier, 1976).
- 513 55. Kao, D. *et al.* The genome of *Parhyale hawaiiensis*: a model for animal development,  
514 regeneration, immunity and ligno-cellulose digestion. *Elife* 1–76 (2016).
- 515 56. Rehm, E. J., Hannibal, R. L., Chaw, R. C., Vargas-Vila, M. A. & Patel, N. H.  
516 Fixation and Dissection of *Parhyale hawaiiensis* Embryos. *Cold Spring Harbor*  
517 *Protocols* **4**, (2009).
- 518 57. Rehm, E. J., Hannibal, R. L., Chaw, R. C., Vargas-Vila, M. A. & Patel, N. H. In Situ  
519 Hybridization of Labeled RNA Probes to Fixed *Parhyale hawaiiensis* Embryos. *Cold*  
520 *Spring Harbor Protocols* **4**, (2009).

- 521 58. Sander, J. D. *et al.* ZiFiT (Zinc Finger Targeter): an updated zinc finger engineering  
522 tool. *Nucleic Acids Res.* **38**, W462–W468 (2010).
- 523 59. Sander, J. D., Zaback, P., Joung, J. K., Voytas, D. F. & Dobbs, D. Zinc Finger  
524 Targeter (ZiFiT): an engineered zinc finger/target site design tool. *Nucleic Acids*  
525 *Res.* **35**, W599–W605 (2007).
- 526 60. Martin, A. *et al.* CRISPR/Cas9 Mutagenesis Reveals Versatile Roles of Hox Genes  
527 in Crustacean Limb Specification and Evolution. *Curr. Biol.* **26**, 14–26 (2016).
- 528 61. Gloor, G. B., Nassif, N. A., Johnson-Schlitz, D. M., Preston, C. R. & Engels, W. R.  
529 Targeted gene replacement in *Drosophila* via P element-induced gap repair. *Science*  
530 **253**, 1110–1117 (1991).
- 531 62. Schram, F. R. *Crustacea*. (Oxford University Press, USA, 1986).
- 532 63. Aguiar, J. C. *et al.* A new species of *Argulus* (Crustacea, Branchiura, Argulidae)  
533 from the skin of catfish, with new records of branchiurans from wild fish in the  
534 Brazilian Pantanal wetland. *Zootaxa* **4320**, 447–469 (2017).
- 535 64. Tanzola, R. D. & Villegas-Ojeda, M. A. *Argulus ventanensis* sp. n. (Crustacea,  
536 Branchiura) parasite of *Hypsiboas pulchellus* tadpoles (Anura, Hylidae). *Pan Am J A*  
537 *S* **12**, 218–226 (2017).
- 538 65. Boxshall, G. Comparative limb morphology in major crustacean groups: the coxa-  
539 basis joint in postmandibular limbs. *Arthropod Relationships* (1998).
- 540 66. Stachowitsch, M. & Proidl, S. *The Invertebrates*. (University of Texas Press, 1992).
- 541 67. Horne, D. J. Homology and homoeomorphy in ostracod limbs. *Hydrobiologia* **538**,  
542 55–80 (2005).
- 543 68. Cohen, A. C., Martin, J. W. & Kornicker, L. S. Homology of Holocene ostracode  
544 biramous appendages with those of other crustaceans: the protopod, epipod, exopod  
545 and endopod. *Lethaia* **31:251-265**, (1998).
- 546 69. Karanovic, T. Two new genera and three new species of subterranean cyclopoids  
547 (Crustacea, Copepoda) from New Zealand, with redescription of *Goniocyclops*  
548 *silvestris* Harding, 1958. *Contributions to Zoology* **74, 3/4**, 223–254 (2005).
- 549 70. Fiers, F. & Jocque, M. Leaf litter copepods from a cloud forest mountain top in  
550 Honduras (Copepoda: Cyclopidae, Canthocamptidae). *Zootaxa* **3630**, 270–290  
551 (2013).
- 552 71. Borradaile, L. A. XXVII.— Notes upon Crustacean limbs. *Journal of Natural*  
553 *History Series II* **17**, 193–213 (1926).
- 554 72. Snodgrass, R. E. *A textbook of arthropod anatomy*. (Ithaca, N.Y., Comstock Pub.  
555 Associates, 1952).
- 556 73. Hof, C. H. J., Schram, F. R. & Watling, L. The place of the Hoplocarida in the  
557 Malacostracan Pantheon. *Journal of Crustacean Biology* **20**, 1–11 (2000).
- 558 74. Ungerer, P. & Wolff, C. External morphology of limb development in the amphipod  
559 *Orchestia cavimana* (Crustacea, Malacostraca, Peracarida). *Zoomorphology* **124**, 89–  
560 99 (2005).
- 561 75. Wolff, C. & Scholtz, G. Cell lineage analysis of the mandibular segment of the  
562 amphipod *Orchestia cavimana* reveals that the crustacean paragnaths are sternal  
563 outgrowths and not limbs. *Front. Zool.* **3**, 19 (2006).
- 564 76. Olesen, J., Haug, J. T., Maas, A. & Waloszek, D. External morphology of *Ligitiella*  
565 *monniotae* (Crustacea, Cephalocarida) in the light of Cambrian ‘Orsten’ crustaceans.  
566 *Arthropod Structure and Development* **40**, 449–478 (2011).



- 567 77. Ferrari, F. D. & Grygier, M. J. Comparative morphology among trunk limbs of  
568 Caenestheriella gifuensis and Leptestheria kawachiensis (Crustacea: Branchiopoda:  
569 Spinicaudata). *Zool J Linn Soc* **139**, 547–564 (2003).
- 570 78. Coulcher, J. F., Edgecombe, G. D. & Telford, M. J. Molecular developmental  
571 evidence for a subcoxal origin of pleurites in insects and identity of the subcoxain  
572 the gnathal appendages. *Sci Rep* **5**, 1–8 (2015).
- 573
